# Supplementary material for: Aging-related anatomical and biochemical changes in lymphatic collectors impair lymph transport, fluid homeostasis, and pathogen clearance
Source: PubMed Central journal article supplement (PMC4531072; doi:10.1111/acel.12330), 2015-05-15
Supplement: acel0014-0582-sd1.pdf [file acel0014-0582-sd1.pdf]

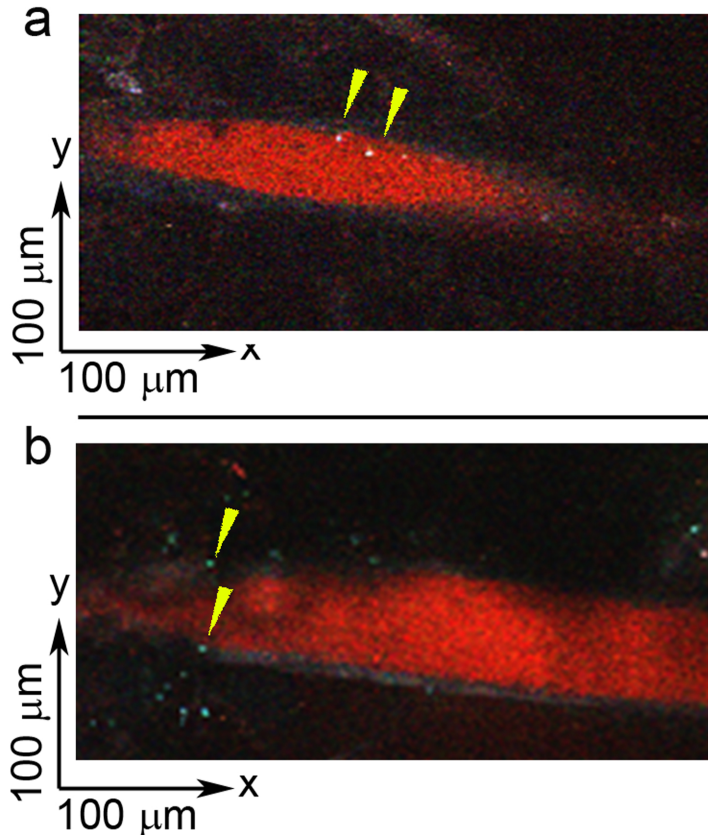

Lymphatic Collector *S. Aureus*

**Figure S1 Compromised pathogens transport and increased lymphatic permeability in aging mice.**

Representative (xy and yz) images of lymphatic collectors in the hind leg taken 1 hour after footpad injection with a TRITC-dextran sinus marker (red) and *Staphylococcus aureus* (cyan) bacteria in the footpad from 4 month (f) and 23 month-old mice (g). Bacteria in vessels highlighted with yellow arrows.

## Supplement Table S1

### Proteomic Analysis of Lymphatic Collectors harvested from 9 and 24 months old rats

#### Proteins

Collagen alpha-1(I) chain  
Collagen alpha-1(II) chain  
Collagen alpha-1(III) chain  
Collagen alpha-1(V) chain  
Collagen alpha-1(XI) chain  
Collagen alpha-1(XII) chain (Fragment)  
Collagen alpha-1(XXIII) chain  
Collagen alpha-1(XXVII) chain  
Collagen alpha-2(I) chain  
Fibronectin  
Fibronectin type III domain-containing protein 1  
Fibronectin type-III domain C1orf233 homolog  
Cartilage oligomeric matrix protein  
Extracellular matrix protein 1  
Non-muscle caldesmon  
Prelamin-A/C

Alpha-actinin-1  
Gelsolin  
Dynactin subunit 1  
Dynein assembly factor 1, axonemal  
Dynein heavy chain 1, axonemal  
Dynein heavy chain 7, axonemal

#### Accession Number

CO1A1\_RAT  
CO2A1\_RAT  
CO3A1\_RAT  
CO5A1\_RAT  
COBA1\_RAT  
COCA1\_RAT  
CONA1\_RAT  
CORA1\_RAT  
CO1A2\_RAT  
FINC\_RAT  
FNDC1\_RAT  
CA233\_RAT  
COMP\_RAT  
ECM1\_RAT  
CALD1\_RAT  
LMNA\_RAT

ACTN1\_RAT  
GELS\_RAT  
DCTN1\_RAT  
DAAF1\_RAT  
DYH1\_RAT  
DYH7\_RAT

|                                                                  |           |
|------------------------------------------------------------------|-----------|
| <b>Troponin I, slow skeletal muscle</b>                          | TNNI1_RAT |
| <b>Troponin T, slow skeletal muscle</b>                          | TNNT1_RAT |
| <b>Unconventional myosin-Ib</b>                                  | MYO1B_RAT |
| <b>Unconventional myosin-Ic</b>                                  | MYO1C_RAT |
| <b>Unconventional myosin-I d</b>                                 | MYO1D_RAT |
| <b>Myosin light chain 1/3, skeletal muscle isoform</b>           | MYL1_RAT  |
| <b>Myosin light chain 3</b>                                      | MYL3_RAT  |
| <b>Myosin light polypeptide 6</b>                                | MYL6_RAT  |
| <b>Myosin-10</b>                                                 | MYH10_RAT |
| <b>Myosin-4</b>                                                  | MYH4_RAT  |
| <b>Myosin-6</b>                                                  | MYH6_RAT  |
| <b>Myosin-8 (Fragment)</b>                                       | MYH8_RAT  |
| <b>Myosin-9</b>                                                  | MYH9_RAT  |
| <b>Myosin-binding protein H-like</b>                             | MBPHL_RAT |
| <b>Actin filament-associated protein 1</b>                       | AFAP1_RAT |
| <b>Actin, cardiac muscle 1</b>                                   | ACTC_RAT  |
| <b>Actin-like protein 7A</b>                                     | ACL7A_RAT |
| <b>Actin-related protein 2/3 complex subunit 1A /5</b>           | ARC1A_RAT |
| <b>Actin-related protein 3</b>                                   | ARP3_RAT  |
| <b>Afadin- and alpha-actinin-binding protein</b>                 | ADIP_RAT  |
| <b>Afadin</b>                                                    | AFAD_RAT  |
| <b>Myogenin</b>                                                  | MYOG_RAT  |
| <b>Myomegalin</b>                                                | MYOME_RAT |
| <b>Myotubularin</b>                                              | MTM1_RAT  |
| <b>Myotubularin-related protein 3</b>                            | MTMR3_RAT |
| <b>Angiomotin-like protein 2</b>                                 | AMOL2_RAT |
| <b>Voltage-dependent T-type calcium channel subunit alpha-1G</b> | CAC1G_RAT |
| <b>Voltage-dependent L-type calcium channel subunit alpha-1C</b> | CAC1C_RAT |
| <b>Plasma membrane calcium-transporting ATPase 3</b>             | AT2B3_RAT |
| <b>Plasma membrane calcium-transporting ATPase 1</b>             | AT2B1_RAT |
| <b>Potassium channel subfamily K member 10</b>                   | KCNKA_RAT |
| <b>Potassium voltage-gated channel subfamily A member 6</b>      | KCNA6_RAT |

|                                                        |           |
|--------------------------------------------------------|-----------|
| Potassium voltage-gated channel subfamily G member 2   | KCNG2_RAT |
| Potassium voltage-gated channel subfamily KQT member 4 | KCNQ4_RAT |
| Potassium-transporting ATPase alpha chain 2            | AT12A_RAT |
| Sodium channel protein type 4 subunit alpha            | SCN4A_RAT |
| Sodium channel protein type 5 subunit alpha            | SCN5A_RAT |
| Sodium channel protein type 9 subunit alpha            | SCN9A_RAT |
| Calcium-activated potassium channel subunit alpha-1    | KCMA1_RAT |
| <br>                                                   |           |
| Alpha-1B adrenergic receptor                           | ADA1B_RAT |
| Alpha-2A adrenergic receptor                           | ADA2A_RAT |
| Beta-adrenergic receptor kinase 1                      | ARBK1_RAT |
| <br>                                                   |           |
| Agrin                                                  | AGRIN_RAT |
| Endothelial PAS domain-containing protein 1            | EPAS1_RAT |
| Clusterin                                              | CLUS_RAT  |
| Clusterin-like protein 1                               | CLUL1_RAT |
| Hyaluronan and proteoglycan link protein 2             | HPLN2_RAT |
| Hyaluronan synthase 2                                  | HAS2_RAT  |
| Ig-like V-type domain-containing protein FAM187A       | F187A_RAT |
| Aggrecan core protein                                  | PGCA_RAT  |
| Versican core protein (Fragments)                      | CSPG2_RAT |
| Chondroitin sulfate proteoglycan 5                     | CSPG5_RAT |
| Chondroitin sulfate proteoglycan 4                     | CSPG4_RAT |
| Brevican core protein                                  | PGCB_RAT  |
| Alpha-2-HS-glycoprotein                                | FETUA_RAT |
| Versican core protein (Fragments)                      | CSPG2_RAT |
| Neurocan core protein                                  | NCAN_RAT  |
| Galectin-4                                             | LEG4_RAT  |
| Mucin-2 (Fragment)                                     | MUC2_RAT  |
| <br>                                                   |           |
| Amiloride-sensitive amine oxidase [copper-containing]  | AOC1_RAT  |
| Amiloride-sensitive sodium channel subunit alpha       | SCNNA_RAT |

|                                                                          |           |
|--------------------------------------------------------------------------|-----------|
| <b>Anion exchange protein 2</b>                                          | B3A2_RAT  |
| <b>Anion exchange protein 3</b>                                          | B3A3_RAT  |
| <b>Cubilin</b>                                                           | CUBN_RAT  |
| <b>Band 3 anion transport protein</b>                                    | B3AT_RAT  |
| <b>Chloride channel protein 2</b>                                        | CLCN2_RAT |
| <b>Chloride anion exchanger</b>                                          | S26A3_RAT |
| <b>Chloride channel protein 1</b>                                        | CLCN1_RAT |
| <b>Chloride intracellular channel protein 6</b>                          | CLIC6_RAT |
| <b>Sodium/calcium exchanger 1</b>                                        | NAC1_RAT  |
| <b>Sodium/hydrogen exchanger 2</b>                                       | SL9A2_RAT |
| <b>Sodium/hydrogen exchanger 5</b>                                       | SL9A5_RAT |
| <b>Sodium-dependent phosphate transport protein 2B</b>                   | NPT2B_RAT |
| <b>Sodium-driven chloride bicarbonate exchanger</b>                      | S4A10_RAT |
| <b>Transient receptor potential cation channel subfamily M member 1</b>  | TRPM1_RAT |
| <b>Electrogenic sodium bicarbonate cotransporter 1</b>                   | S4A4_RAT  |
| <b>Electrogenic sodium bicarbonate cotransporter 4</b>                   | S4A5_RAT  |
| <b>Nephrin</b>                                                           | NPHN_RAT  |
| <b>Junction plakoglobin</b>                                              | PLAK_RAT  |
| <b>Basal cell adhesion molecule</b>                                      | BCAM_RAT  |
| <b>Cadherin EGF LAG seven-pass G-type receptor 2 (Fragment)</b>          | CELR2_RAT |
| <b>Cadherin EGF LAG seven-pass G-type receptor 3</b>                     | CELR3_RAT |
| <b>Cadherin-1</b>                                                        | CADH1_RAT |
| <b>Cadherin-17</b>                                                       | CAD17_RAT |
| <b>Cadherin-2</b>                                                        | CADH2_RAT |
| <b>Cadherin-20</b>                                                       | CAD20_RAT |
| <b>Cadherin-23</b>                                                       | CAD23_RAT |
| <b>Cadherin-6</b>                                                        | CADH6_RAT |
| <b>Cadherin-7</b>                                                        | CADH7_RAT |
| <b>Integrin alpha-7</b>                                                  | ITA7_RAT  |
| <b>Integrin alpha-D</b>                                                  | ITAD_RAT  |
| <b>Integrin-linked kinase-associated serine/threonine phosphatase 2C</b> | ILKAP_RAT |
| <b>Integrin-linked protein kinase</b>                                    | ILK_RAT   |

**Contactin-4**  
**Desmoglein-4**  
**Gap junction gamma-2 protein**  
**Gap junction alpha-4 protein**  
**Protocadherin alpha-4**  
**Protocadherin Fat 2**  
**Protocadherin Fat 3**

CNTN4\_RAT  
DSG4\_RAT  
CXG2\_RAT  
CXA4\_RAT  
PCDA4\_RAT  
FAT2\_RAT  
FAT3\_RAT

**Lymphatic Muscle Contraction**

**Extracellular Matrix Proteins**

**Adrenergic Receptors**

**Membrane Potential-related Ion Channel Proteins**

**Glycocalix-associated Proteins**

**Ion Channel-related proteins**

**Adherence Molecules**
